# Supplementary material for: NMR and EPR structural delineation of copper(ii) complexes formed by kanamycin A in water
Source: Royal Society of Chemistry journal article supplement (doi:10.1039/b313060f), 2004-01-01
Supplement: b313060f.pdf [file b313060f.pdf]

**Supporting Data for:****NMR and EPR structural delineation of copper (II) complexes formed by kanamycin A in water.****Nicola D'Amelio<sup>1</sup>, Elena Gaggelli<sup>1</sup>, Nicola Gaggelli<sup>1</sup>, Elena Molteni<sup>1</sup>, Maria Camilla Baratto<sup>1</sup>, Gianni Valensin<sup>1\*</sup>, Małgorzata Jeżowska-Bojczuk<sup>2</sup> and Wojciech Szczepanik<sup>2</sup>**<sup>1</sup>*Department of Chemistry and the NMR Center, University of Siena, Via A.Moro 2, Siena 53100, Italy*<sup>2</sup>*Faculty of Chemistry, University of Wrocław, F.Joliot-Curie 14, Wrocław 50-383, Poland*

\* To whom correspondence should be addressed, e-mail: [valensin@unisi.it](mailto:valensin@unisi.it), fax: +39-0577-234233, tel: +39-0577-234231.

---

**Experimental Supplementary Informations on Molecular Dynamics Calculations.**

In this procedure, the potential energy is a function of the difference between the distance constraints provided by the user and corresponding distances found in a given conformer. No other potential energy terms are present except van der Waals repulsions. At the beginning of the calculation an arbitrary number of different conformers is generated by randomly varying torsional dihedral angles. Then, the potential energy is minimised by a simulated annealing procedure in the torsion angle space in which the system is brought to high temperature to allow all possible high energy starting conformations and subsequently cooled down in order to stabilize it in the potential energy minima, which better satisfy the imposed constraints.

In particular we performed the calculation with the program DYANA using 10000 steps and 300 random relative starting positions of kanamycin and Cu(II). Since the program does not support amino-sugars, the library was modified by treating kanamycin as a residue linked to Cu(II) through a long chain of linkers without van der Waals radius. These linkers can freely rotate around their bonds and enable to sample all possible relative positions of the ligand with respect to copper before the minimization step. The kanamycin "residue" was built allowing completely free rotation around the bonds connecting the rings and the bonds linking the substituents. In addition each ring was allowed to assume all possible chair or boat conformations (2 chairs and 6 boats) yielding a total of 512 conformers. Each conformer was then allowed to have 50 different metal - ligand relative positions before the minimization routine.

The structures of the complexes thus generated only rely on experimental data and no assumption is made on the conformation assumed by the ligand before co-ordination.

**Table S1.**  $^1\text{H}$  chemical shifts (ppm) of KanA 0.5 mM in  $\text{D}_2\text{O}$  at pH 5.5, 7.4 and 12.0 (values uncorrected for the isotopic effect),  $T=298$  K. Chemical shifts were referenced to internal TSP.

| <b>Proton</b>     | <b>pH 5.5</b> | <b>pH 7.4</b> | <b>pH 12.0</b> |
|-------------------|---------------|---------------|----------------|
| $\text{H}_1'$     | 5.592         | 5.563         | 5.342          |
| $\text{H}_2'$     | 3.684         | 3.652         | 3.621          |
| $\text{H}_3'$     | 3.794         | 3.774         | 3.728          |
| $\text{H}_4'$     | 3.394         | 3.385         | 3.340          |
| $\text{H}_5'$     | 4.027         | 4.030         | 3.782          |
| $\text{H}_6'$     | 3.456         | 3.434         | 3.007          |
|                   | 3.194         | 3.176         | 2.782          |
| $\text{H}_1$      | 3.530         | 3.282         | 2.921          |
| $\text{H}_2$ (eq) | 2.493         | 2.224         | 1.981          |
| $\text{H}_2$ (ax) | 1.896         | 1.560         | 1.242          |
| $\text{H}_3$      | 3.530         | 3.181         | 2.908          |
| $\text{H}_4$      | 3.757         | 3.592         | 3.341          |
| $\text{H}_5$      | 3.919         | 3.809         | 3.680          |
| $\text{H}_6$      | 3.874         | 3.547         | 3.273          |
| $\text{H}_1''$    | 5.153         | 5.118         | 5.060          |
| $\text{H}_2''$    | 3.954         | 3.812         | 3.519          |
| $\text{H}_3''$    | 3.510         | 3.343         | 3.026          |
| $\text{H}_4''$    | 3.719         | 3.608         | 3.354          |
| $\text{H}_5''$    | 3.956         | 3.958         | 3.943          |
| $\text{H}_6''$    | 3.853         | 3.825         | 3.796          |
|                   | 3.800         | 3.809         |                |

**Table S2.** Non selective ( $R^{\text{n sel}}$ ,  $s^{-1}$ ), single-selective ( $R^{\text{sel}}$ ,  $s^{-1}$ ) and double-selective ( $R^{\text{b sel}}$ ,  $s^{-1}$ ) relaxation rates of H<sub>2</sub> protons of KanA 0.5 mM in D<sub>2</sub>O at pH 5.5, 7.4 and 12.0 (values uncorrected for the isotopic effect), T = 298 K. Values for the rotational correlation time,  $\tau_R$ , were obtained from the geminal ( $r = 0.177$  nm) cross-relaxation rates ( $\sigma$  ( $s^{-1}$ ) =  $R^{\text{b sel}} - R^{\text{sel}}$ )

| Proton  | $R^{\text{sel}}$ | $R^{\text{b sel}}$ | $\sigma$ | $\tau_R$<br>(ps) |
|---------|------------------|--------------------|----------|------------------|
| pH 5.5  |                  |                    |          |                  |
| H2 (eq) | 2.48             | 2.75               | 0.27     | 217              |
| H2 (ax) | 2.62             | 2.78               | 0.16     | 249              |
| pH 7.4  |                  |                    |          |                  |
| H2 (eq) | 2.24             | 2.52               | 0.28     | 215              |
| H2 (ax) | 2.21             | 2.53               | 0.32     | 203              |
| pH 12.0 |                  |                    |          |                  |
| H2 (eq) | 2.09             | 2.38               | 0.29     | 212              |
| H2 (ax) | 2.07             | 2.23               | 0.16     | 249              |

**Table S3.** EPR magnetic parameters of Cu(II)-KanA complexes at pH 7.4 and 12.0.

|                         | pH=7.4 | pH=12.0 |
|-------------------------|--------|---------|
| $g_{\parallel}$         | 2.220  | 2.231   |
| $G_{\perp}$             | 2.057  | 2.052   |
| $A_{\parallel}^a$       | 196.4  | 194.7   |
| $A_{\perp}^a$           | 21.4   | 17.2    |
| $n^{\circ} N^b$         | 2      | 2       |
| $A_{\text{Niso}}^{a,c}$ | 12.4   | 12.2    |

<sup>a</sup> Coupling constants are given in  $\text{cm}^{-1}$  and multiplied by a factor of  $10^4$

<sup>b</sup> Number of equatorial nitrogen donor atoms

<sup>c</sup> Isotropic superhyperfine coupling constant

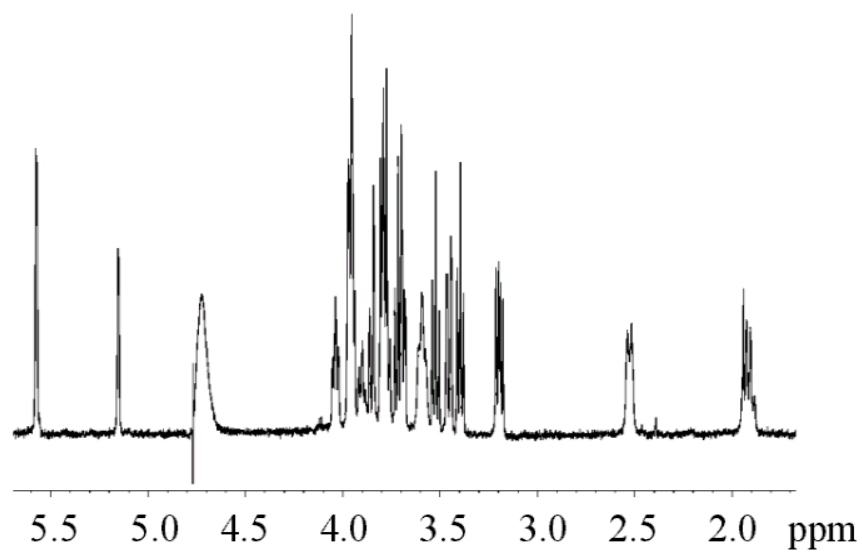

**Figure S1.** <sup>1</sup>H-NMR spectrum of KanA 0.5 mM in D<sub>2</sub>O at 298 K and pH 5.5 (value uncorrected for the isotopic effect) recorded at 600 MHz.  
N.D'Amelio, E.Gaggelli, N.Gaggelli, E.Molteni, M.C.Baratto, G.Valensin, M.Jeżowska-Bojczuk and W.Szczepanik
